# Supplementary material
Source: Springer Nature journal article supplement (https://www.springermedizin.de/resource/supplementary/12957_2010_830_MOESM1_ESM.pdf/9565954)

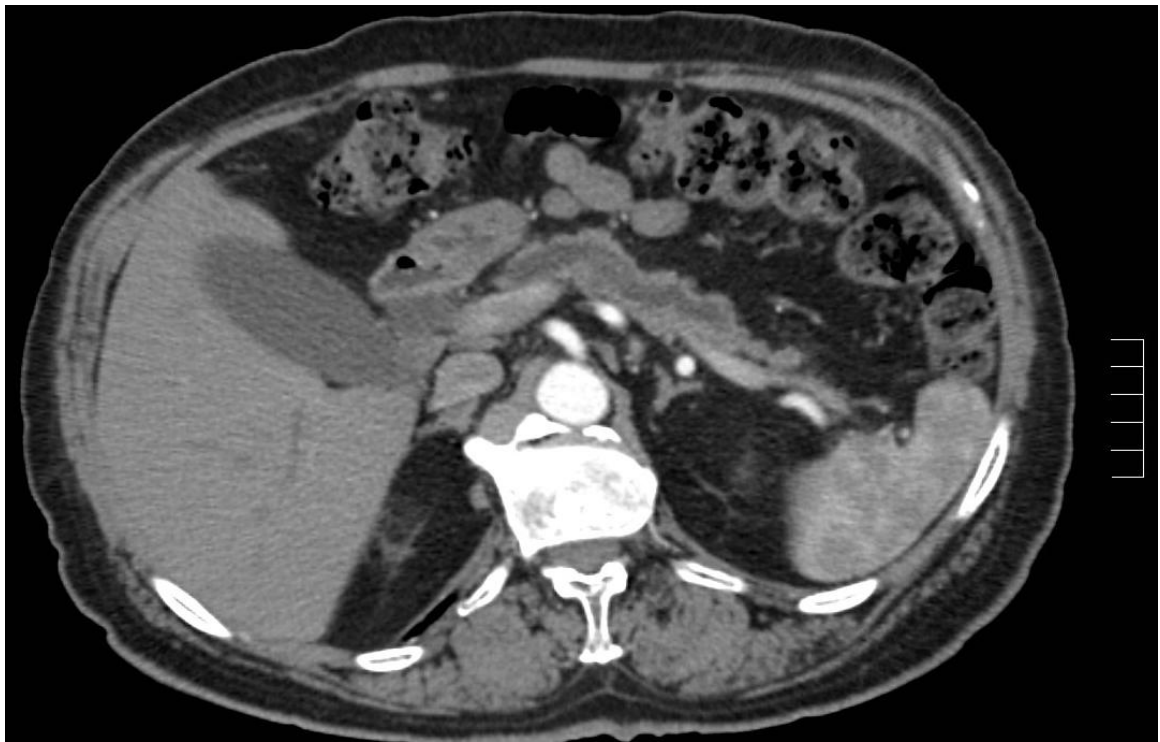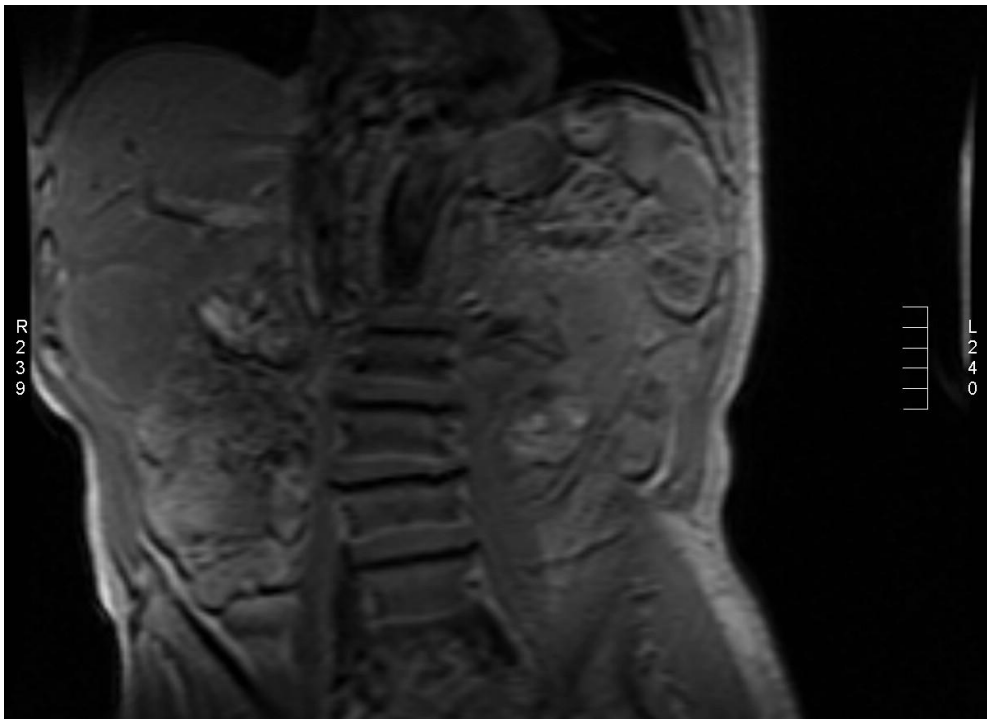

Supplement: MOESM1 [file 9565954]
